# Supplementary material for: Altered sub-seasonal predictability of Community Atmosphere Model 5 (CAM5) in CESM 1.2.1 by the choices of dynamical core
Source: Copernicus journal article supplement (doi:10.5194/gmd-2020-22), 2020-04-06
Supplement: Supplementary file 1 [file gmd-2020-22-supplement.pdf]

Supplementary Figure List

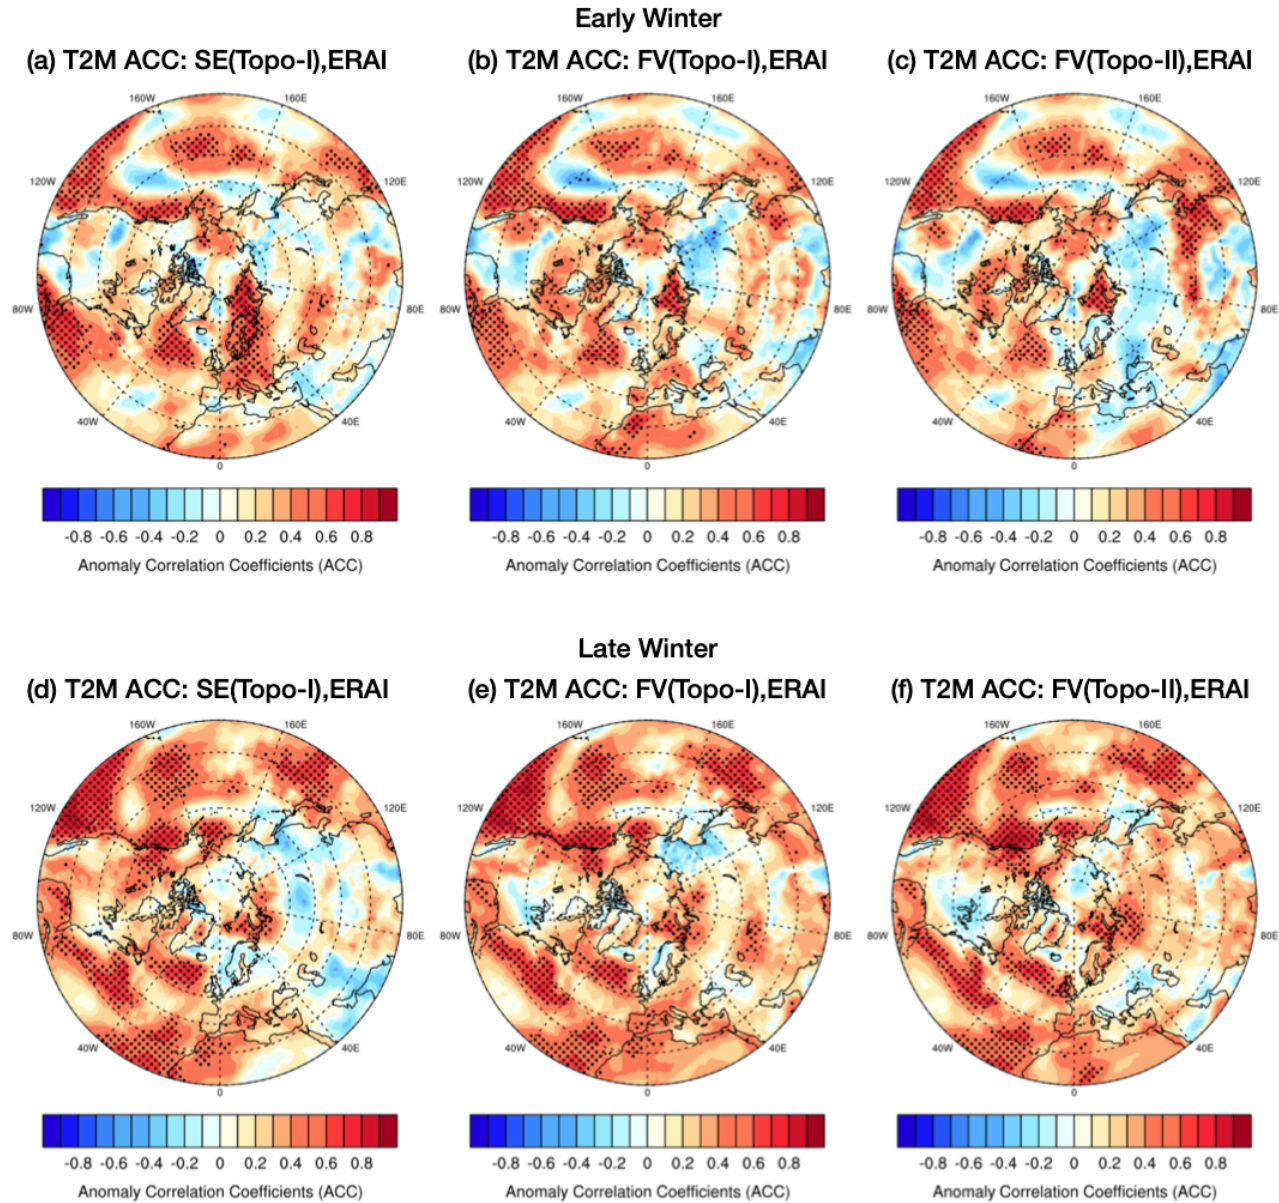

Figure S 1: Same as Figure 3 except for the filled mask on the ocean area.

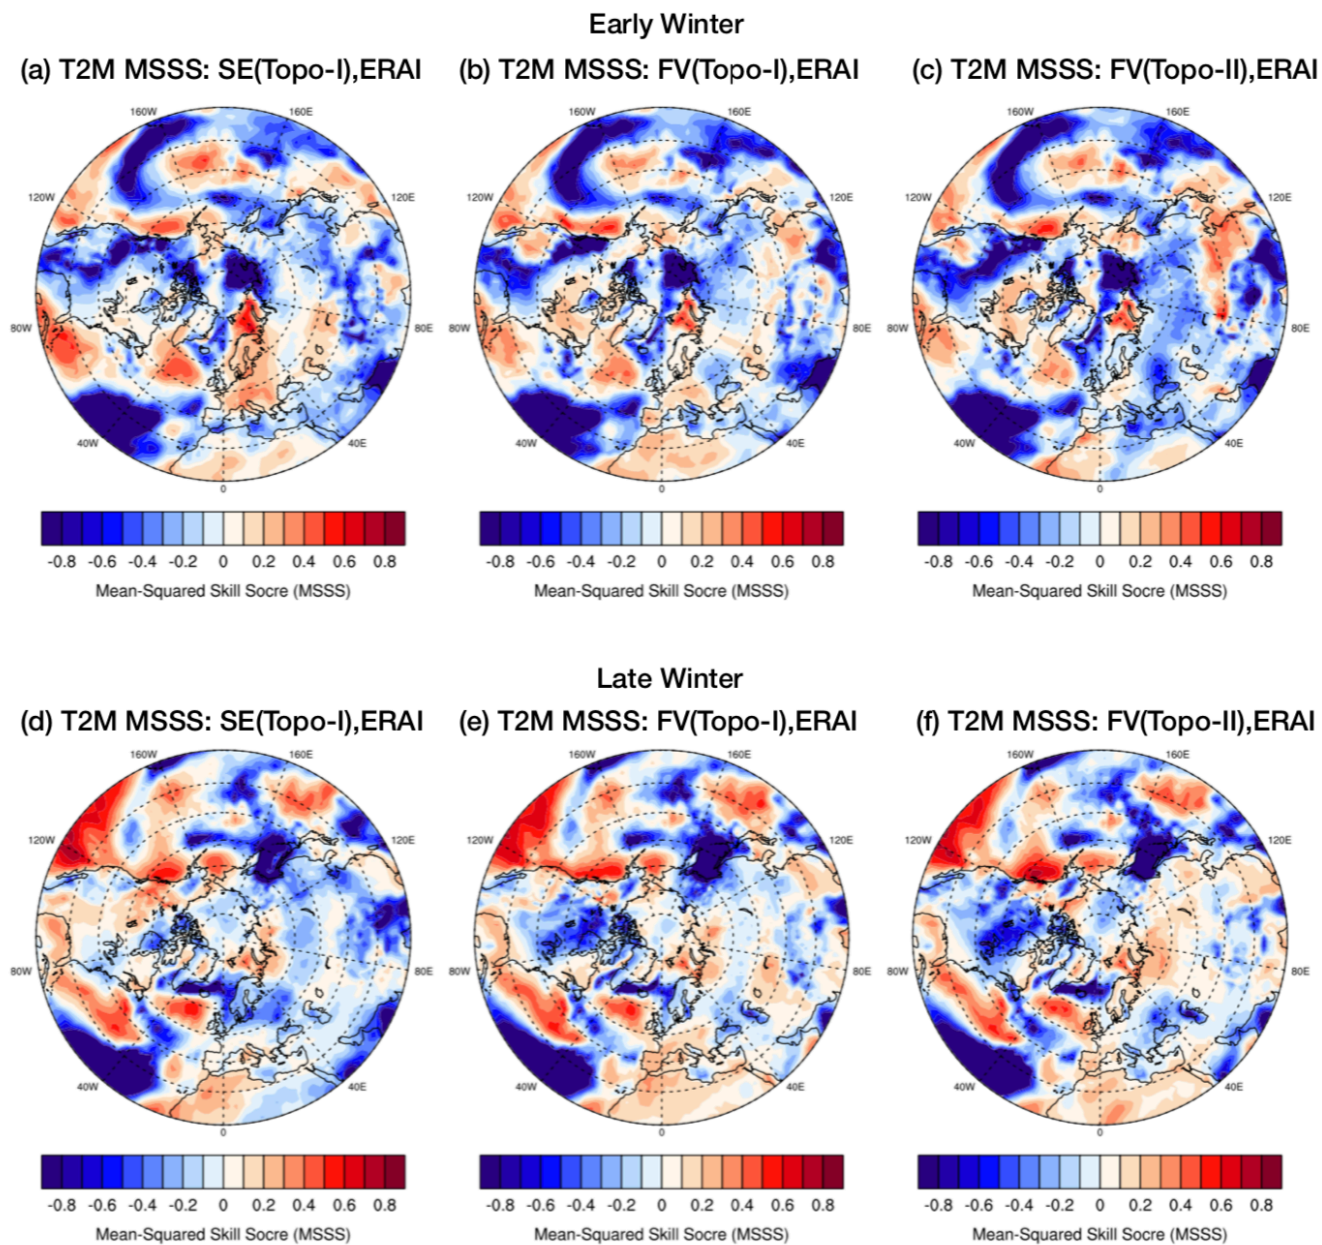

Figure S 2: Same as Figure 4 except for the filled mask on the ocean area.

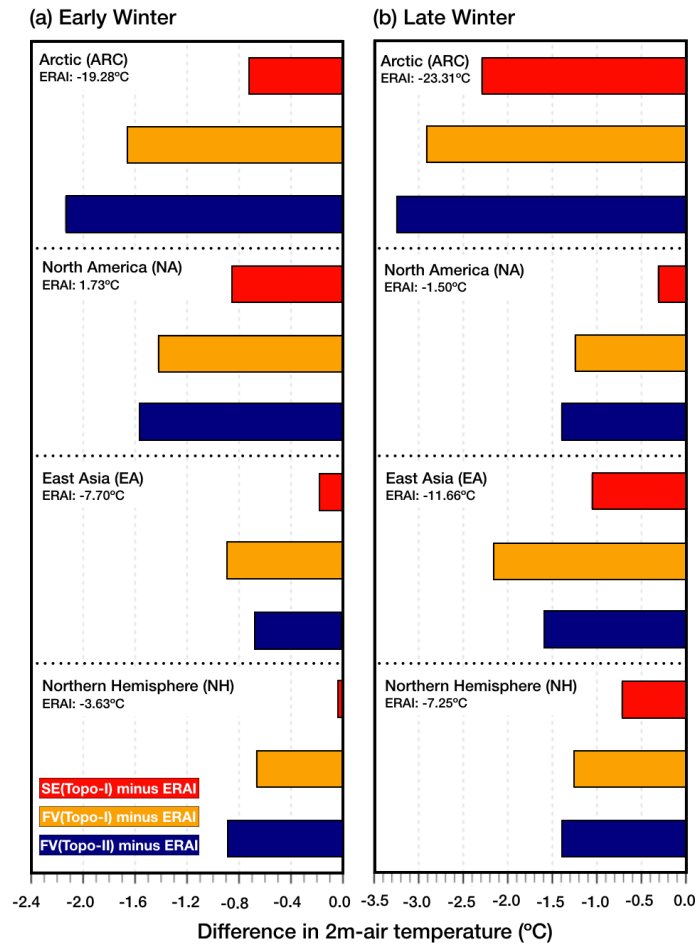

Figure S 3: Difference in 2m-air temperature between models and ERA-Interim reanalysis (ERA-I) during (a) early winter, (b) late winter. Difference for SE (Topo-I) (red), FV(Topo-I) (yellow), FV(Topo-II) (blue) model on Arctic (ARC), North America (NA), East Asia (EA), and Northern Hemisphere (NH).
